# Supplementary material for: Effects of 60Coγ-irradiation combined with sodium dehydrogenate on post-harvest preservation and physiological indices of Volvariella volvacea
Source: PeerJ. 2024 Sep 30;12:e18177. doi: 10.7717/peerj.18177 (PMC11448749; doi:10.7717/peerj.18177)
Supplement: Supplemental Information 1 — Sensory evaluation of the mushroom experiments. [file peerj-12-18177-s001.xlsx]

## Sheet: SOD activity
			SOD activity
1d	CK	1	0.601059
	CK	2	0.965971
	CK	3	0.571324
	A	1	0.796555
	A	2	0.783606
	A	3	0.581966
	B	1	1.15596
	B	2	1.65076
	B	3	1.07716
	C	1	0.635659
	C	2	0.585007
	C	3	0.530941
2d	CK	1	13.1279
	CK	2	0.906561
	CK	3	6.87744
	A	1	0.952519
	A	2	0.382764
	A	3	1.15636
	B	1	1.21237
	B	2	1.59906
	B	3	2.1468
	C	1	4.93765
	C	2	2.90234
	C	3	6.39249
3d	CK	1	1.19099
	CK	2	0.692423
	CK	3	0.578029
	A	1	0.504649
	A	2	0.545051
	A	3	8.35524
	B	1	0.317371
	B	2	0.335103
	B	3	0.476736
	C	1	0.421564
	C	2	0.670417
	C	3	0.376695
4d	CK	1	0.598457
	CK	2	0.203286
	CK	3	0.311975
	A	1	0.4888
	A	2	0.3666
	A	3	0.024859
	B	1	0.595934
	B	2	0.444558
	B	3	0.421617
	C	1	2.17516
	C	2	0.315749
	C	3	0.150011
5d	CK	1	0.178336
	CK	2	0.52181
	CK	3	0.634419
	A	1	0.87924
	A	2	0.21607
	A	3	0.696675
	B	1	0.938706
	B	2	0.22125
	B	3	0.720234
	C	1	0.382905
	C	2	0.307485
	C	3	0.928666
6d	CK	1	1.71238
	CK	2	1.66197
	CK	3	3.59474
	A	1	2.95739
	A	2	3.97446
	A	3	2.05107
	B	1	1.46575
	B	2	0.37488
	B	3	1.20627
	C	1	1.08854
	C	2	2.18007
	C	3	1.61028
7d	CK	1	1.32732
	CK	2	1.02152
	CK	3	1.29074
	A	1	1.18519
	A	2	1.12469
	A	3	0.780675
	B	1	1.45791
	B	2	1.0104
	B	3	0.768668
	C	1	1.71991
	C	2	1.4142
	C	3	1.22014

## Sheet: POD activity
	1d	POD activity	ck	A	B	C
		1d	1.84215	2.35653	4.82316	2.61177
		1d	2.55183	2.6851	4.76907	1.8576
		1d	2.36324	2.04929	4.10467	1.91019
		2d	3.69157	2.27296	3.0447	7.85633
		2d	3.1997	2.45341	3.3378	7.3232
		2d	3.41241	3.39018	4.02568	7.64121
		3d	4.16321	1.67386	1.78921	1.67654
		3d	3.47082	1.84497	2.09882	2.42095
		3d	3.65609	1.85409	1.5462	1.27671
		4d	3.30834	2.57314	5.65613	3.38672
		4d	3.64842	1.81218	3.09794	2.99621
		4d	4.02298	1.71308	3.69784	3.51658
		5d	2.20454	2.3065	2.2165	1.46956
		5d	2.20174	2.22446	2.64777	1.5166
		5d	2.32	1.85519	2.28356	1.7238
		6d	3.92795	7.58233	5.77291	7.76279
		6d	4.22414	8.15469	5.95202	7.40045
		6d	4.97021	7.0572	5.14506	7.26403
		7d	3.50818	3.01457	3.28656	2.63551
		7d	3.68261	3.28057	2.96735	2.40896
		7d	3.56158	2.72907	2.98564	2.30204

## Sheet: MDA content
	MDA content	ck	A	B	C
1d	1	80.462	114.769	52.615	54.462
1d	2	84.538	125.231	54.462	60.692
1d	3	81.231	132.692	65.692	58.846
2d	1	32.373	56.61	52.881	30
2d	2	27.288	55.932	57.966	27.458
2d	3	35.085	59.322	57.966	23.729
3d	1	24.565	46.033	43.859	32.174
3d	2	23.967	43.859	55.272	38.098
3d	3	21.576	43.043	46.033	33.261
4d	1	52	36.164	49.726	69.521
4d	2	53.425	47.945	58.836	60.616
4d	3	59.178	51.575	51.781	60.411
5d	1	36.164	44.056	30.021	33.636
5d	2	40.203	46.434	35.455	33.566
5d	3	38.259	46.063	43.636	36.434
6d	1	124.725	84.835	160.879	111.868
6d	2	123.297	83.626	168.462	105.824
6d	3	123.736	88	152.352	108.022
7d	1	47.748	67.47	40.795	31.192
7d	2	49.404	60.477	45.232	28.411
7d	3	53.444	60	43.709	37.748
					b

## Sheet: VC content
	VC content	ck	A	B	C
1d	1d	0.0828242	0.376526	0.519138	0.238179
	1d	0.275791	0.349827	0.586092	0.121463
	1d	0.140432	0.217736	0.660559	0.180904
	2d	1.75319	0.663108	0.752293	2.13122
	2d	1.21055	0.642128	0.790177	1.84135
	2d	1.22554	0.727236	0.702203	2.24604
	3d	1.19462	0.360927	0.424577	1.79105
	3d	1.18292	0.520373	0.92374	1.62565
	3d	1.23944	0.310124	0.517814	1.2089
	4d	1.79105	1.2663	1.42186	1.47253
	4d	1.62565	0.909626	1.23395	1.04427
	4d	1.2089	0.702655	1.08339	1.50656
2d	5d	1.27316	0.84236	0.768756	1.1824
	5d	1.3423	0.505733	0.511218	1.22699
	5d	1.28728	0.749589	0.793252	1.32959
	6d	1.73501	1.74498	1.48969	1.48915
	6d	2.05616	1.54364	1.08826	1.0623
	6d	1.60551	2.17215	1.54306	1.54258
	7d	1.6848	1.04352	3.03183	1.42439
	7d	1.86587	1.16271	2.26847	1.4659
	7d	1.36587	0.950544	2.08783	0.779489
3d
4d
5d
6d
7d

## Sheet: Soluble protein content
	Soluble protein content	ck	A	B	C
1d	1	37.9187	26.5431	16.8784	37.4101
1d	2	33.2368	25.7801	18.1791	38.9591
1d	3	38.3811	29.5257	14.0749	35.9996
2d	1	16.5178	15.9362	14.8893	2.90806
2d	2	15.78	15.0056	13.726	3.58347
2d	3	15.98	14.1913	13.3771	3.86116
3d	1	17.6324	31.5527	32.1734	37.224
3d	2	18.6636	27.9438	29.2822	33.4068
3d	3	15.5701	28	34.8524	31.6579
4d	1	13.3677	18.8845	15.3264	16.1317
4d	2	15.1359	25.1794	15.3796	17.5407
4d	3	17.7529	24.755	16.0554	16.409
5d	1	26.5614	30.2607	27.1569	38.7619
5d	2	25.4176	30.1533	27.1097	37.9993
5d	3	23.8926	27.1968	26.3072	32.5817
6d	1	14.0156	11.4829	13.1842	12.0348
6d	2	13.8165	12.234	12.8086	11.7205
6d	3	13.6707	10.3335	12.7283	10.4523
7d	1	18.0341	16.382	19.9822	14.8567
7d	2	19.0627	19.1814	21.618	16.5893
7d	3	18.8922	31.7789	20.6098	14.7967

## Sheet: Respiration rate
	Respiration rate	CK	A	B	C
1d	1	4.99619	6.75493	4.47203	5.45995
1d	2	6.91452	6.5537	4.60941	4.45838
1d	3	6.37768	7.63178	4.74046	4.4505
2d	1	7.78278	6.4047	6.35901	9.16427
2d	2	6.00858	6.18473	5.79777	9.39924
2d	3	6.92469	5.81469	5.17786	9.85802
3d	1	6.58319	4.72559	4.22516	4.08514
3d	2	7.84299	4.43767	4.49115	4.63722
3d	3	7.26345	4.40127	4.78147	4.58573
4d	1	9.5539	6.52644	6.05571	5.59712
4d	2	8.48301	6.23054	6.56714	5.05769
4d	3	8.49597	7.41914	5.61033	5.7909
5d	1	9.2571	6.11424	6.16814	3.37932
5d	2	9.36357	6.1942	6.73142	3.41235
5d	3	8.71049	5.37744	5.97242	3.46721
6d	1	5.79138	4.58278	5.53011	5.47182
6d	2	5.28793	4.94279	6.38951	4.51347
6d	3	6.89599	4.59631	6.38858	4.33851
7d	1	5.47442	3.12892	5.43508	3.86559
7d	2	5.69359	4.71379	6.98984	3.33446
7d	3	6.56379	3.67122	5.31242	3.51859

## Sheet: Degree of browning
Degree of browning	CK	A	B	C
1d	0.448333	0.591	0.576333	0.335333
1d	0.632333	0.522667	0.518333	0.490333
1d	0.545333	0.606	0.570333	0.480333
2d	0.39	0.354667	0.457667	0.486333
2d	0.471667	0.368667	0.46	0.680333
2d	0.425	0.418667	0.387667	0.382
3d	0.545	0.646667	0.960333	1.24233
3d	0.833	0.710667	0.956	1.025
3d	0.764	0.645333	0.999	1.01567
4d	1.58067	1.45667	1.52233	1.384
4d	0.897	1.16967	2.206	0.798667
4d	1.00167	1.011	1.35867	1.34767
5d	1.61133	0.529333	0.957333	1.73267
5d	1.922	0.645667	1.22233	1.14433
5d	2.07933	0.847667	1.004	1.19333
6d	2.696	1.678	1.309	1.417
6d	2.28233	1.30267	6.495	0.969333
6d	1.556	1.21567	1.36467	1.638
7d	1.74467	0.839667	3.12333	1.80967
7d	1.834	0.738	3.30633	1.793
7d	0.879	0.833	1.108	2.58833

## Sheet: Weight loss 
	Weight loss	CK	A	B	C
1d	1	0.0245762	0.0191351	0.0160323	0.0120542
1d	2	0.0201388	0.0207411	0.0154165	0.0118605
1d	3	0.0225051	0.0189119	0.017114	0.0115545
2d	1	0.0231213	0.0337148	0.0308903	0.0212712
2d	2	0.025242	0.0296183	0.0273196	0.0273473
2d	3	0.0244136	0.0325857	0.0282054	0.0236163
3d	1	0.0321314	0.0322725	0.0287652	0.0364068
3d	2	0.0383653	0.0366415	0.0352677	0.0283216
3d	3	0.0353177	0.0540926	0.0311859	0.0303607
4d	1	0.0405914	0.0458419	0.04253	0.0483887
4d	2	0.0456844	0.0419413	0.040684	0.0414889
4d	3	0.0400337	0.0445069	0.0370052	0.0386473
5d	1	0.0549564	0.0554624	0.057498	0.0470883
5d	2	0.0591678	0.0506724	0.060428	0.0488212
5d	3	0.0582299	0.0573075	0.0585338	0.0483503
6d	1	0.0627624	0.0686869	0.0677801	0.0719623
6d	2	0.0649051	0.0638112	0.0628319	0.0654941
6d	3	0.0711824	0.0629365	0.066424	0.0621526
7d	1	0.0596949	0.0858297	0.0702391	0.0733565
7d	2	0.0607336	0.0809158	0.0763882	0.0860897
7d	3	0.0646011	0.0757173	0.0878741	0.0710575

## Sheet: Hardness
	Hardness	CK	A	B	C
1d	1	4.41667	4.4	2.93333	4.03
1d	2	3.93333	3.68	3.12667	3.3
1d	3	4.42	3.90333	3.08333	3.76667
2d	1	2.54	3.92667	3.1	3.56
2d	2	2.62667	4.13333	3.69333	2.37333
2d	3	2.96667	4.33667	3.04333	3.91333
3d	1	3.72667	3.96	3.26667	3.47667
3d	2	2.38667	4.29333	2.76667	2.76667
3d	3	6.06667	3.5	2.26667	2.32667
4d	1	2.13333	2.57	2.06667	1.7
4d	2	2.23333	2.49333	1.91667	2.1
4d	3	3.34	2.00667	2.09333	1.86667
5d	1	1.61	4.12667	2.35	1.76667
5d	2	1.8	3.87333	2.2	1.15
5d	3	1.73333	3.66667	2.15333	1.6
6d	1	1.53333	2.2	1.83333	2.96667
6d	2	1.6	2.36667	1.81667	2.96667
6d	3	1.71667	2.33333	1.6	2.85
7d	1	1.67333	3.78	1.56667	1.21667
7d	2	1.86667	3.06667	1.48333	1.26667
7d	3	1.76667	2.76667	1.81	1.09

## Sheet: Sensory evaluation
Sensory evaluation	1d	2d	3d	4d	5d	6d	7d
CK	17	14	12	10	9	9	6
CK	16	15	11	11	10	8	7
CK	15	14	11	10	10	8	7
A	17	15	15	14	14	14	13
A	17	16	16	15	15	13	12
A	16	16	15	16	14	15	12
B	17	15	15	14	12	11	10
B	16	16	13	13	12	12	10
B	16	15	13	13	13	11	11
C	17	15	14	12	13	11	10
C	15	15	13	13	12	12	9
C	16	14	14	12	11	10	9

[truncated: 1 more sheets: Correlation]
